# Supplementary material
Source: PubMed Central journal article supplement (PMC2748826)

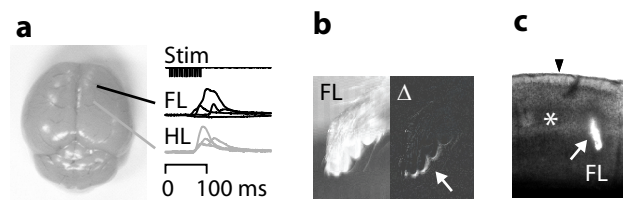

**Figure S1**

Supplement: NIHMS132605-supplement-fig_s1.pdf [file NIHMS132605-supplement-fig_s1.pdf]

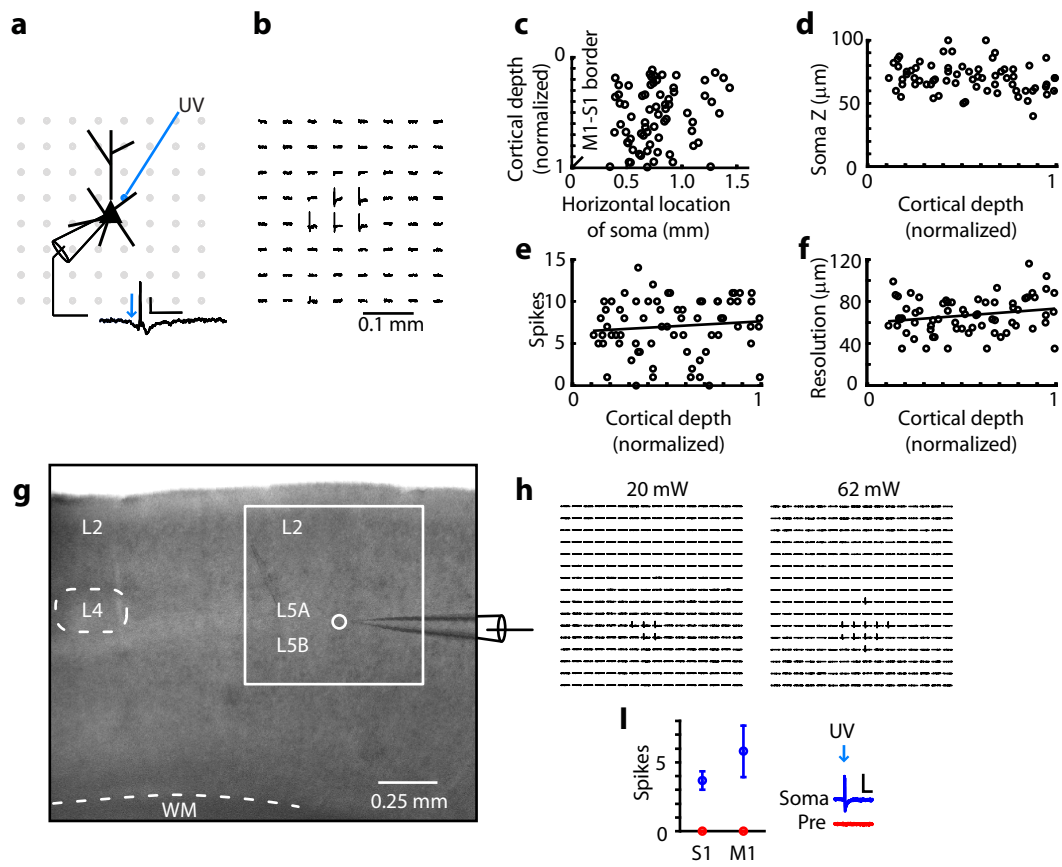

**Figure S2**

Supplement: NIHMS132605-supplement-fig_s2.pdf [file NIHMS132605-supplement-fig_s2.pdf]

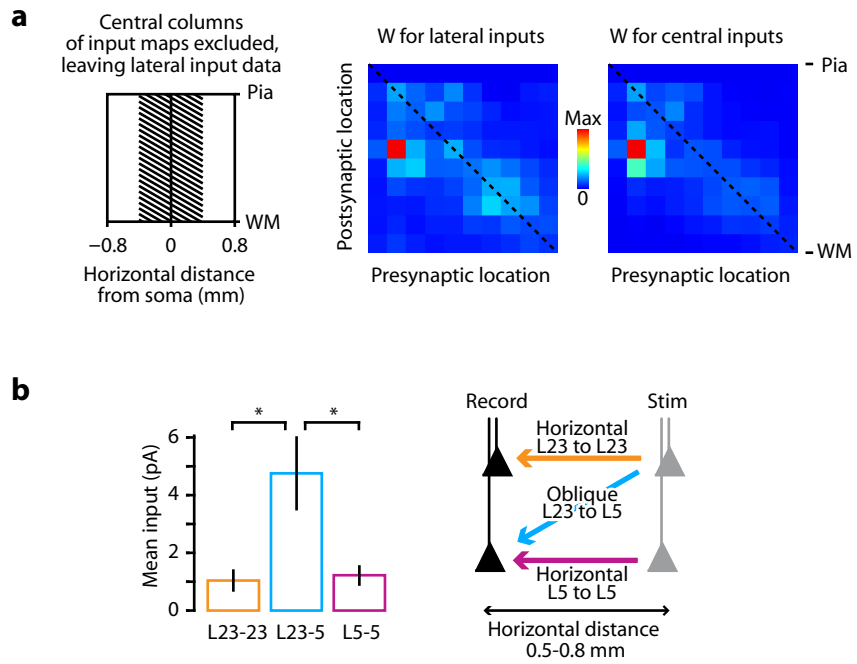

**Figure S3**

Supplement: NIHMS132605-supplement-fig_s3.pdf [file NIHMS132605-supplement-fig_s3.pdf]
